# Supplementary material for: Arsenic Trioxide Synergistically Promotes the Antileukaemic Activity of Venetoclax by Downregulating Mcl-1 in Acute Myeloid Leukaemia Cells
Source: Research Square preprint supplement (doi:10.21203/rs.3.rs-130872/v1), 2020-12-28
Supplement: Supplementary file 1 [file 7858bed88bd2303b42eee2bd.docx]

**Supplementary Table 1. Baseline patient characteristics of primary AML samples**

| Parameters | Median (range) |
| --- | --- |
| Age (years) | 52.5 (44­–65) |
| WBC, ×109/L | 20.6 (2.4­–69.5) |
| LDH, IU/L | 463 (310­–749) |
| Bone marrow blasts, % | 70.7 (52.0­–86.3) |
| Peripheral blood blasts, % | 56.5 (31­–67) |

Abbreviations: AML, acute myeloid leukemia; WBC, white blood cells; LDH, lactate dehydrogenase.
